# Supplementary material for: Somatic mutation dynamics in MDS patients treated with azacitidine indicate clonal selection in patients-responders
Source: PubMed Central journal article supplement (PMC5762372; doi:10.18632/oncotarget.22957), 2017-12-06
Supplement: oncotarget-08-111966-s001.pdf [file oncotarget-08-111966-s001.pdf]

# Somatic mutation dynamics in MDS patients treated with azacitidine indicate clonal selection in patients-responders

## SUPPLEMENTARY MATERIALS

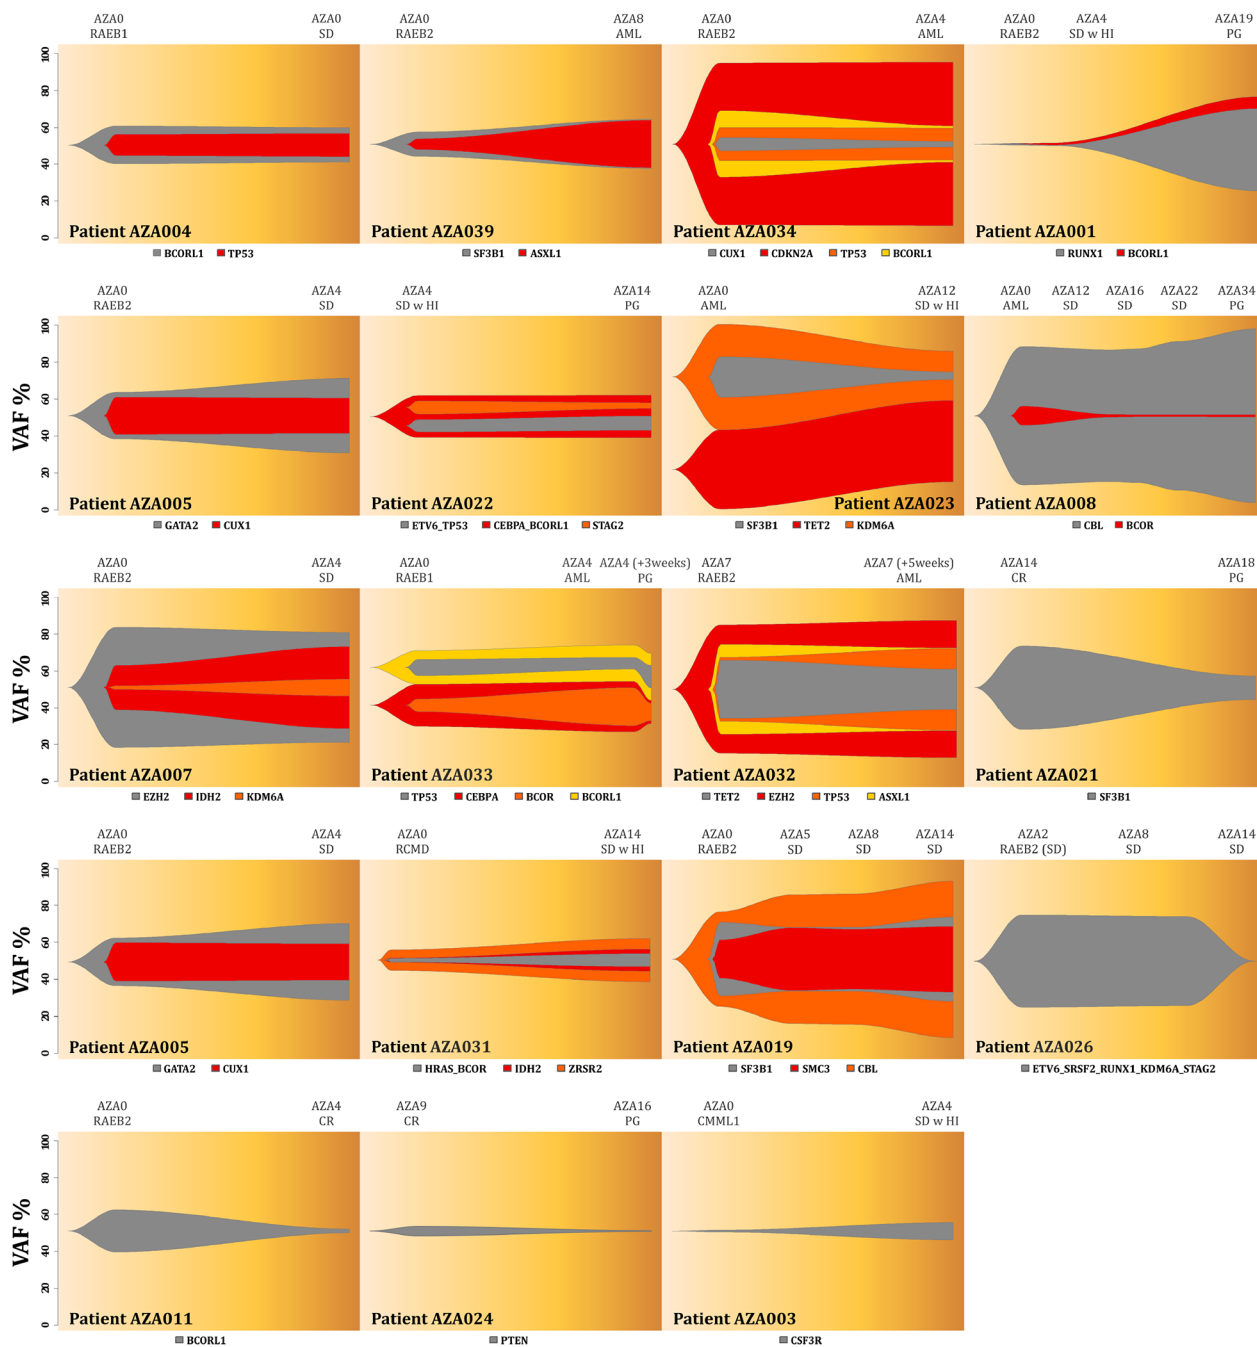

Supplementary Figure 1: Fish plots of somatic variants with stable profiles detected in MDS patients.

**Supplementary Table 1: Clinical data of the MDS cohort indicating (from top): demographics, MDS classification, IPSS-R, cytogenetics, selected BM and PB findings, and finally the responses**

| <b>Demographics</b>                              |      |           |
|--------------------------------------------------|------|-----------|
| <i>Age (median, range)</i>                       | 70   | 57-82     |
| <i>Sex (number, %)</i>                           |      |           |
| Female                                           | 20   | 53%       |
| Male                                             | 18   | 47%       |
| <b>MDS classification (number, %)</b>            |      |           |
| <i>RA</i>                                        | 0    | 0%        |
| <i>RARS</i>                                      | 0    | 0%        |
| <i>RCMD</i>                                      | 1    | 3%        |
| <i>RAEB1</i>                                     | 13   | 34%       |
| <i>RAEB2</i>                                     | 17   | 45%       |
| <i>MDS/AML</i>                                   | 5    | 13%       |
| <i>CMML</i>                                      | 2    | 5%        |
| <b>IPSS-R risk group (number, %)</b>             |      |           |
| <i>Very low</i>                                  | 0    | 0%        |
| <i>Low</i>                                       | 1    | 3%        |
| <i>Intermediate</i>                              | 14   | 37%       |
| <i>High</i>                                      | 18   | 47%       |
| <i>Very high</i>                                 | 5    | 13%       |
| <b>Cytogenetics risk group (number, %)</b>       |      |           |
| <i>Very good</i>                                 | 0    | 0%        |
| <i>Good</i>                                      | 26   | 68%       |
| <i>Intermediate</i>                              | 5    | 13%       |
| <i>Poor</i>                                      | 4    | 11%       |
| <i>Very poor</i>                                 | 3    | 8%        |
| <b>Karyotype (number, %)</b>                     |      |           |
| <i>Normal</i>                                    | 16   | 42%       |
| <i>Abnormal</i>                                  | 22   | 58%       |
| <b>Clinical characteristics (median, range)</b>  |      |           |
| <i>BM-Blasts [%]</i>                             | 10   | 2-26      |
| <i>PB-Hemoglobin [g/L]</i>                       | 91   | 62-128    |
| <i>PB-ANC [<math>\times 10^9/L</math>]</i>       | 1.24 | 0.01-11.6 |
| <i>PB-Platelets [<math>\times 10^9/L</math>]</i> | 80   | 2-576     |
| <b>Outcome (number, %)</b>                       |      |           |
| <i>CR</i>                                        | 11   | 29%       |
| <i>SD with HI</i>                                | 11   | 29%       |
| <i>SD without HI</i>                             | 12   | 10,5 %    |
| <i>primary PG</i>                                | 4    | 31,5 %    |
| <i>AML transformation (total)</i>                | 24   | 63%       |

**Supplementary Table 2: Complete list of detected variants.** Patients' codes are in the 1st column. Responses to AZA are listed in the 2nd column: PG progression, SD stable disease, SD w HI, CR: short (<12 Mo) and long (>12Mo). Mutation dynamics is listed in the 3rd column (VAF INC= increasing more than 2-fold, DEC=decreasing more than 2-fold, complex dynamics: INC-DEC & DEC-INC, ST= stable). Gene symbols, gene localization, amino acid change (AA), and COSMIC assembly (or NA= not assembled) as indicated.

**See Supplementary File 1**

**Supplementary Table 3: List of all variants and clinical and laboratory data.** Codes of AZA-treated patients, their OS (Mo), IPSS-R, sample codes, % BM myeloblasts (MB), cycles of AZA, cytogenetic data, occurrence of AML progression together with gene mutations and their VAF accompanied by reads numbers are shown.

**See Supplementary File 2**

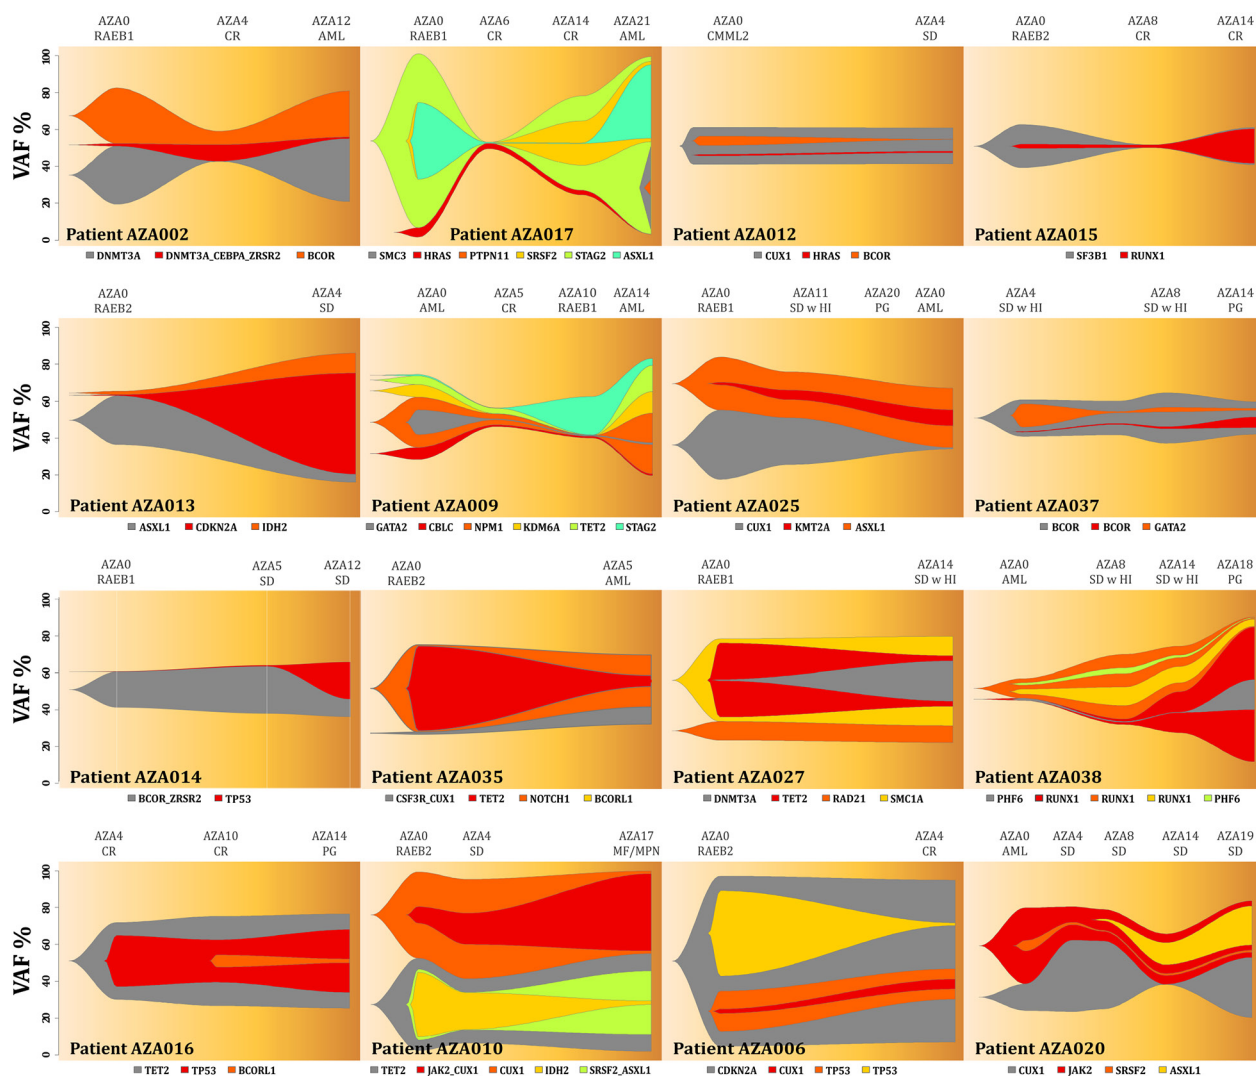

Supplementary Figure 2: Fish plots of somatic variants with highly unstable and variable profiles detected in MDS patients.
